# Supplementary material
Source: publisher site journal article supplement (https://www.dovepress.com/article/260761)
Supplement: Supplementary file 1 [file get_supplementary_file.php]

## Supplementary 1

### Primary and secondary outcomes

|                                       | T0      |       |       |       | T1      |       |       |       |
|---------------------------------------|---------|-------|-------|-------|---------|-------|-------|-------|
|                                       | Rise-uP |       | CG    |       | Rise-uP |       | CG    |       |
|                                       | M       | SD    | M     | SD    | M       | SD    | M     | SD    |
| Pain Intensity (0 - 10)               | 5.22    | 1.71  | 5.21  | 1.74  | 3.37    | 2.35  | 4.02  | 2.19  |
| Anxiety (0 - 21)                      | 5.71    | 5.84  | 5.13  | 5.51  | 5.47    | 5.90  | 6.44  | 6.23  |
| Depression (0-21)                     | 7.95    | 7.14  | 7.13  | 7.21  | 7.62    | 7.59  | 8.84  | 8.07  |
| Stress (0-21)                         | 12.12   | 7.58  | 11.34 | 8.01  | 10.75   | 7.95  | 12.61 | 8.01  |
| Functional ability (0% - 100%)        | 72.4%   | 18.6% | 78.1% | 17.6% | 80.2%   | 18.1% | 78.3% | 17.8% |
| Mental wellbeing (M = 50, SD = 10)    | 45.80   | 10.96 | 47.12 | 11.28 | 47.13   | 11.22 | 45.09 | 11.07 |
| Physical wellbeing (M = 50, SD = 10)) | 40.65   | 8.38  | 43.38 | 8.16  | 46.06   | 8.42  | 45.69 | 8.00  |

Means and standard deviations for the primary and secondary outcomes at T0 and T1 both for the Rise-uP and the control group. The table contains values of those patients who were analyzed in the present paper (completers).

## Supplementary 2

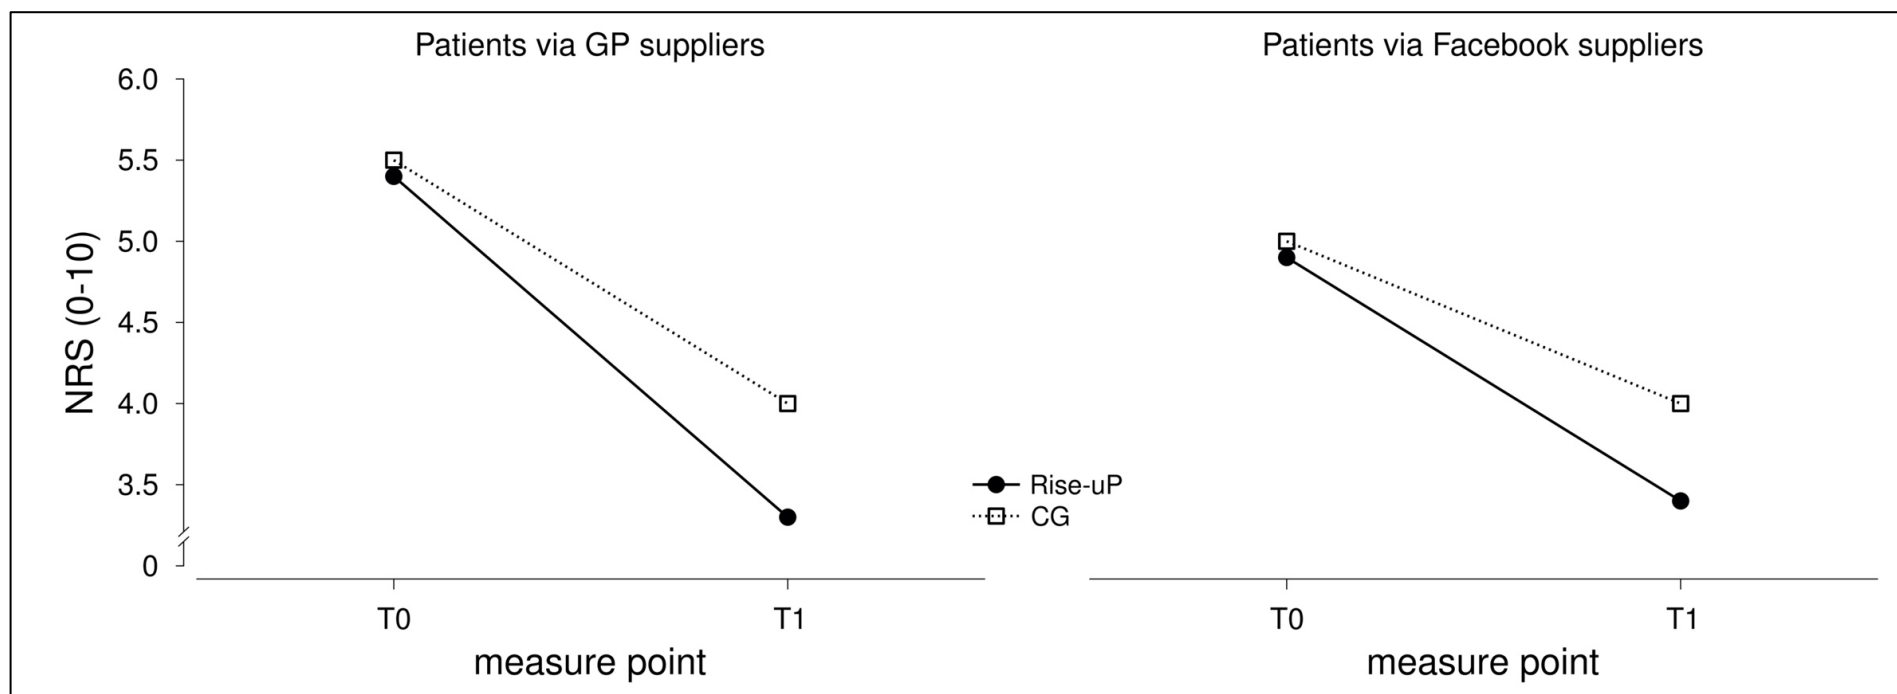

Illustration of the pain index scores at T0 and T1 for both groups (Rise-uP vs. CG) separately for GP suppliers and Facebook suppliers. Visual inspection reveals a similar profile for organic and Facebook patients.
